# Supplementary material for: Exploring xylose metabolism in Spathaspora species: XYL1.2 from Spathaspora passalidarum as the key for efficient anaerobic xylose fermentation in metabolic engineered Saccharomyces cerevisiae
Source: PubMed Central journal article supplement (PMC4974763; doi:10.1186/s13068-016-0570-6), 2016-08-05

## Additional file 1.pdf

Time course of substrate consumption (xylose at an initial concentration of 40-50 g.L<sup>-1</sup>) and product formation by *Spathaspora* species under moderate (left column) and severe (right column) oxygen-limited batch fermentations. Symbols: square (continuous line) – xylose; circle (dashed line) – ethanol; triangle (continuous line) – xylitol; diamond (dashed line) – cells.

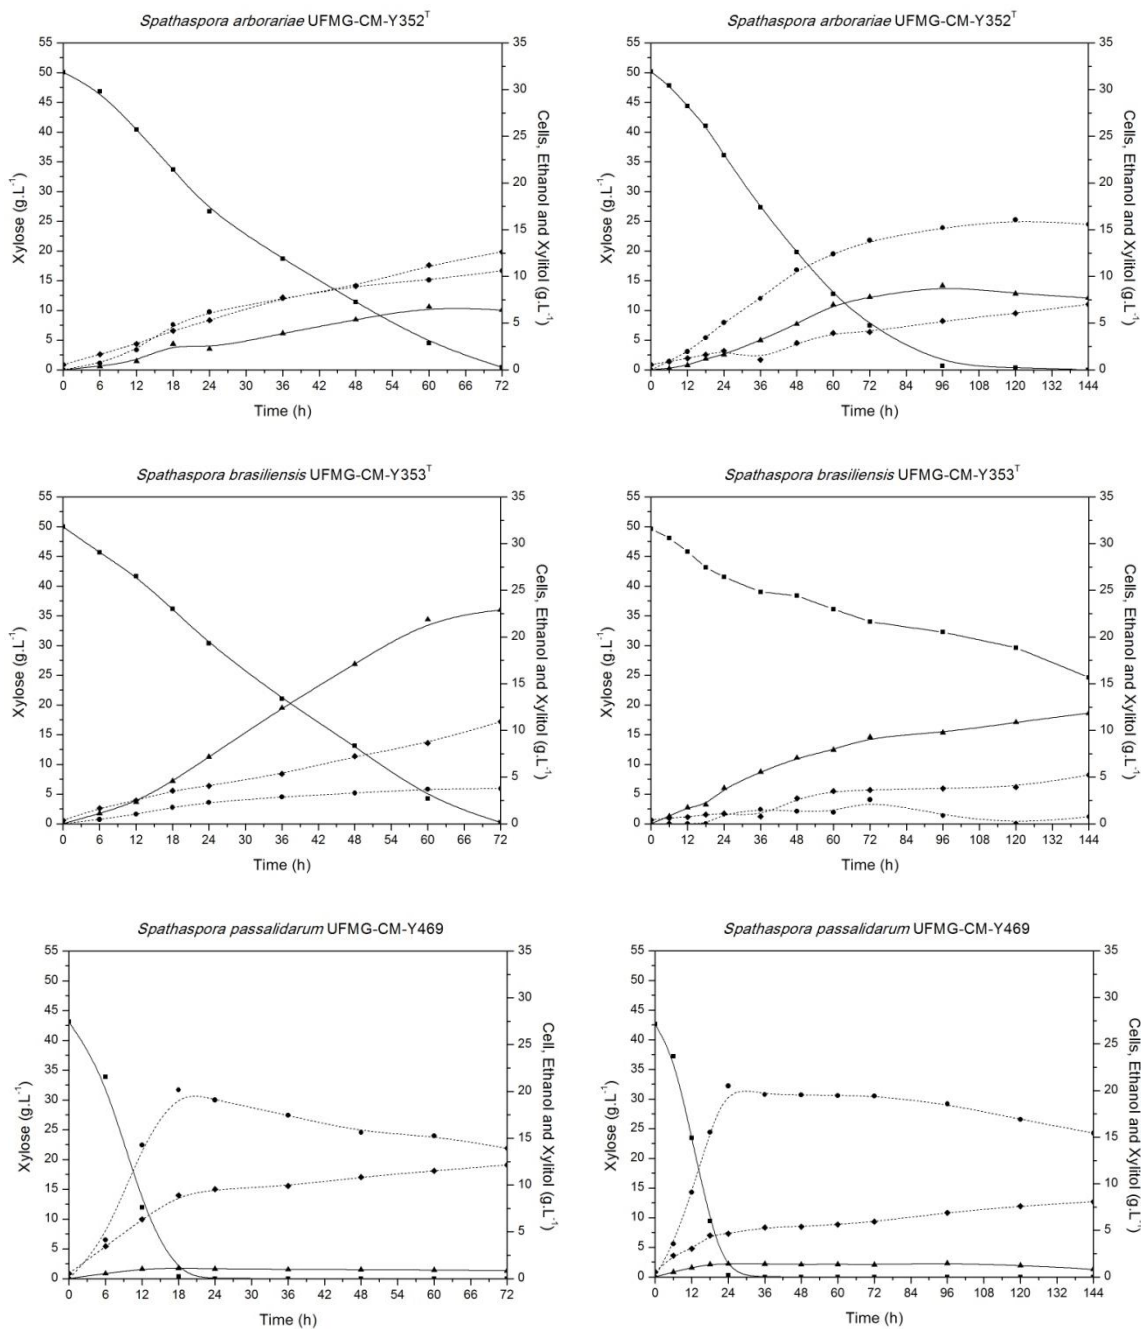

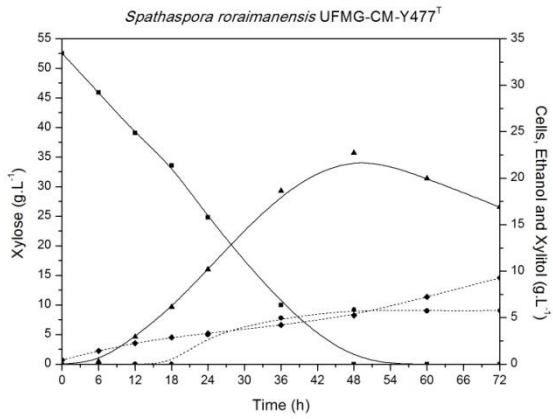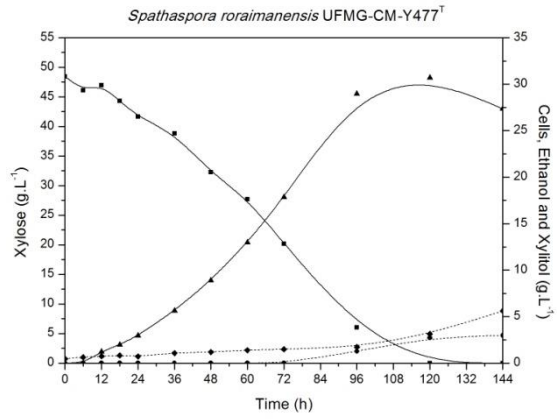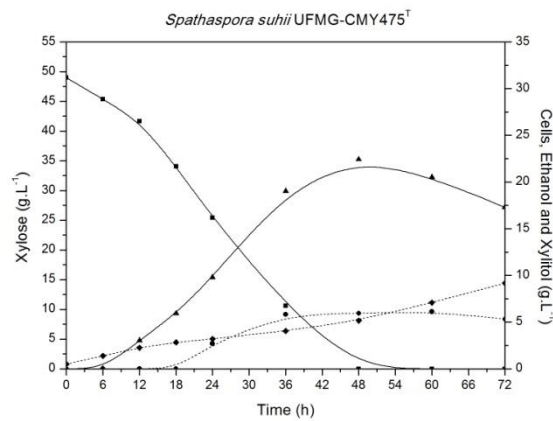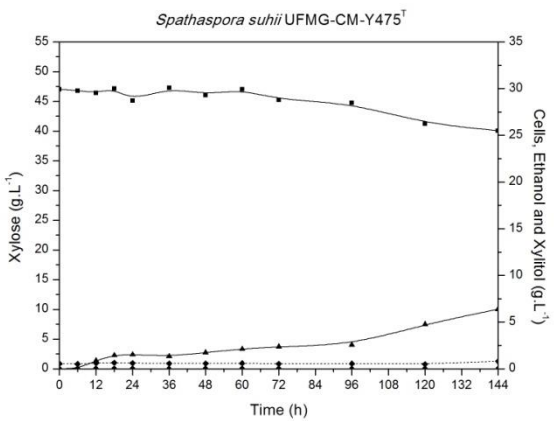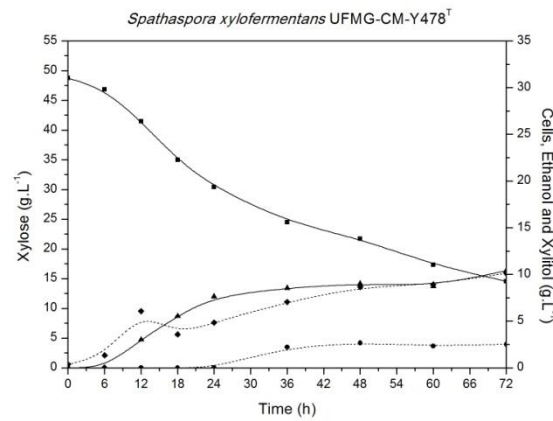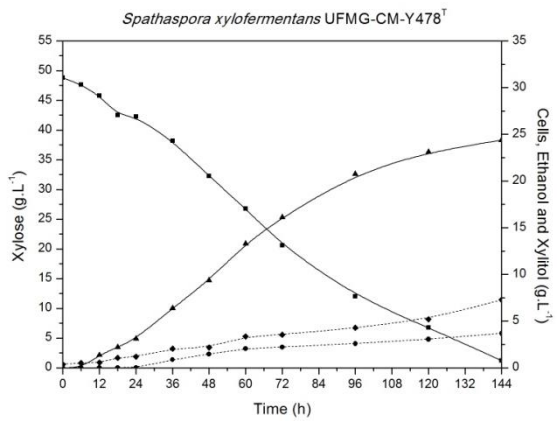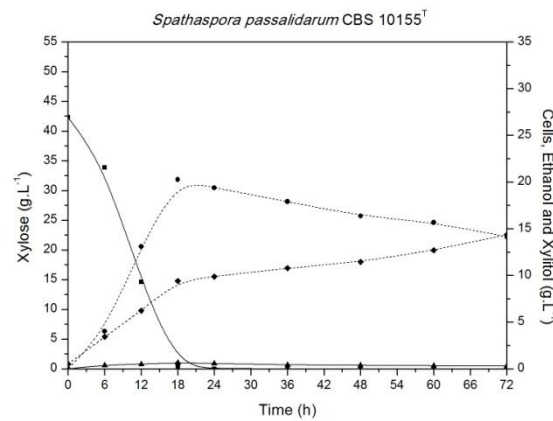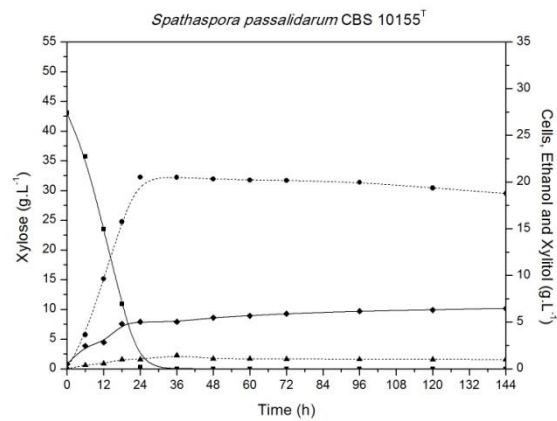

Supplement: 13068_2016_570_MOESM1_ESM.pdf [file 13068_2016_570_MOESM1_ESM.pdf]
