# Supplementary material for: Exploring xylose metabolism in Spathaspora species: XYL1.2 from Spathaspora passalidarum as the key for efficient anaerobic xylose fermentation in metabolic engineered Saccharomyces cerevisiae
Source: PubMed Central journal article supplement (PMC4974763; doi:10.1186/s13068-016-0570-6), 2016-08-05
Supplement: 13068_2016_570_MOESM3_ESM.pdf [file 13068_2016_570_MOESM3_ESM.pdf]

### Additional file 3.pdf

List and sequence of primers used in this study.

| Primer            | Sequence (5'-3')                      |
|-------------------|---------------------------------------|
| SpspXYL1.1_F      | TTTTGTGTAATCTCGGAT                    |
| SpspXYL1.1_R      | TTTTATTAATGCTAATCGATAAC               |
| SppaXYL1.2_F      | ATTACTACTTACAAGTAAAACACA              |
| SppaXYL1.2_R      | ATTATCAGTGATCCAAAGAATGAA              |
| SppaXYL1.1_XbaIF  | <b>GACTCTAGA</b> ATGGCTACTATTAATTAATT |
| SppaXYL1.1_XbaIR  | <b>GACTCTAG</b> ATTAAACGAAGATTGGAATG  |
| SppaXYL1.2_XbaIF  | <b>GACTCTAGA</b> ATGTCTTTTAAATTATCT   |
| SppaXYL1.2_XbaIR  | <b>GACTCTAG</b> ATTAAACAAAGATTGGAAT   |
| Sppa_xyl1.1_rtFor | CTCAGGTCACCTTGATGCCTTTAG              |
| Sppa_xyl1.1_rtRev | TCTTTAAACCGTCACCGACTTCC               |
| Sppa_xyl1.2_rtFor | GCCACCATTCCCTCAGCAAATTTAC             |
| Sppa_xyl1.2_rtRev | CTCTTAACAAGACCGTCTTCAATAGC            |
| Sppa_act1_rtFor   | AGATACCCAATTGAACACGGTATCG             |
| Sppa_act1_rtRev   | GATTTAGGATTCATTGGAGCTTCAG             |
| Sppa_rdn18_rtFor  | TCACCAGGTCCAGACACAATAAG               |
| Sppa_rdn18_rtRev  | GGTTAAGGTCTCGTTTCGTTATCG              |

Sites for restriction endonucleases are indicated in **bold**
